# Supplementary material for: Ganoderma lucidum extract (GLE) impairs breast cancer stem cells by targeting the STAT3 pathway
Source: PubMed Central journal article supplement (PMC6267592; doi:10.18632/oncotarget.26294), 2018-11-13
Supplement: oncotarget-09-35907-s001.pdf [file oncotarget-09-35907-s001.pdf]

## *Ganoderma lucidum* extract (GLE) impairs breast cancer stem cells by targeting the STAT3 pathway

### SUPPLEMENTARY MATERIALS

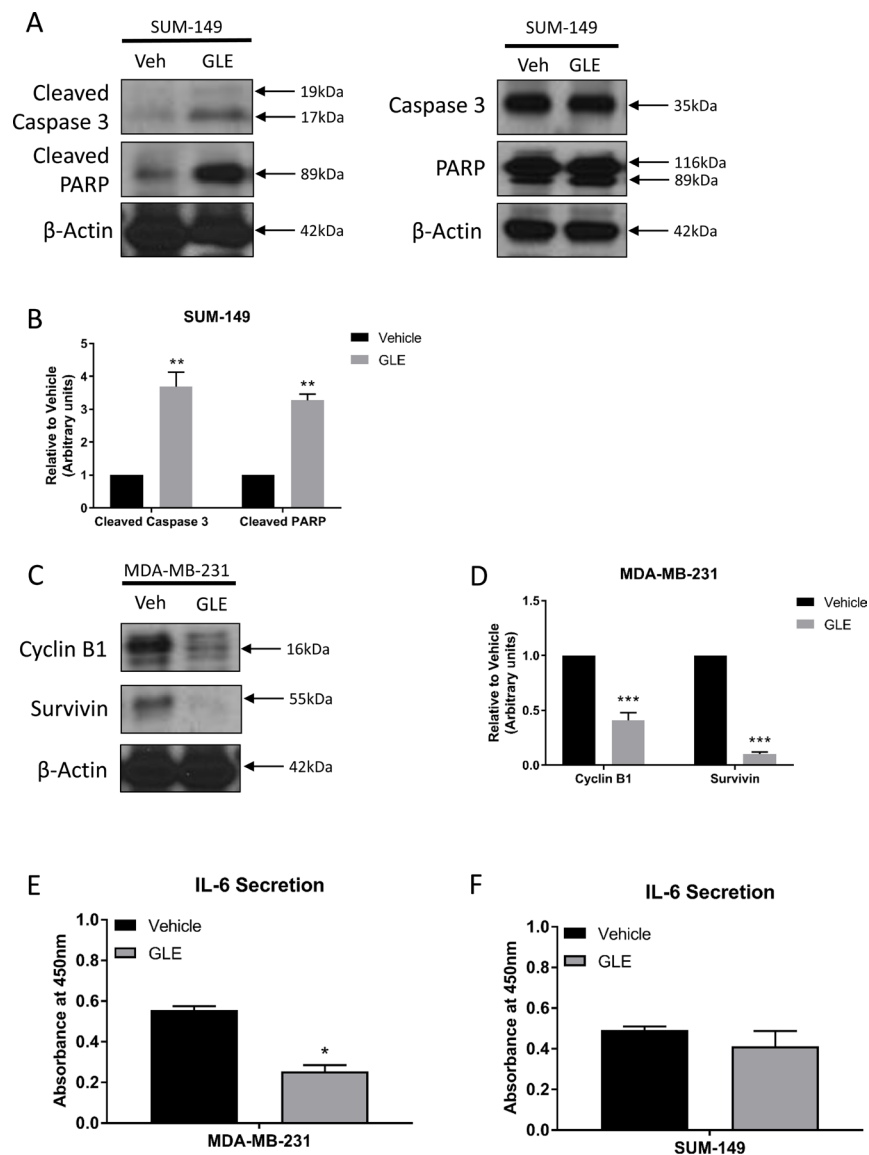

**Supplementary Figure 1: GLE decreases levels of proteins involved in cell death and proliferation in both TNBC cell lines and decreases IL-6 secretion in MDA-MB-231 cells.** (A) Western blot analyses of proteins related with apoptosis (Cleaved Caspase 3, Caspase 3, Cleaved PARP, and PARP) were analyzed, with results showing (B) GLE significantly increases the expression of cleaved caspase 3 and cleaved PARP in SUM-149 cells at 24 h in comparison to the vehicle. (C) The expression of cell proliferation proteins (Cyclin B1 and Survivin) by immunoblots assays shows that (D) GLE significantly decreases the expression of both proteins in MDA-MB-231 cells at 24 h in comparison to the vehicle. For both experiments,  $\beta$ -actin was used as a loading control. ELISA assays were performed in MDA-MB-231 cells (E), and SUM-149 cells (F), to detect IL-6 secretion after treatment with GLE for 24 h. Results show a decrease in IL-6 secretion in MDA-MB-231 cells, but not in the SUM-149 cell line. Columns represent mean  $\pm$  SEM from 2 independent experiments. \* $P \leq 0.05$ ; \*\* $P < 0.01$ ; \*\*\* $P < 0.001$ , was considered statistically significant compared to vehicle.

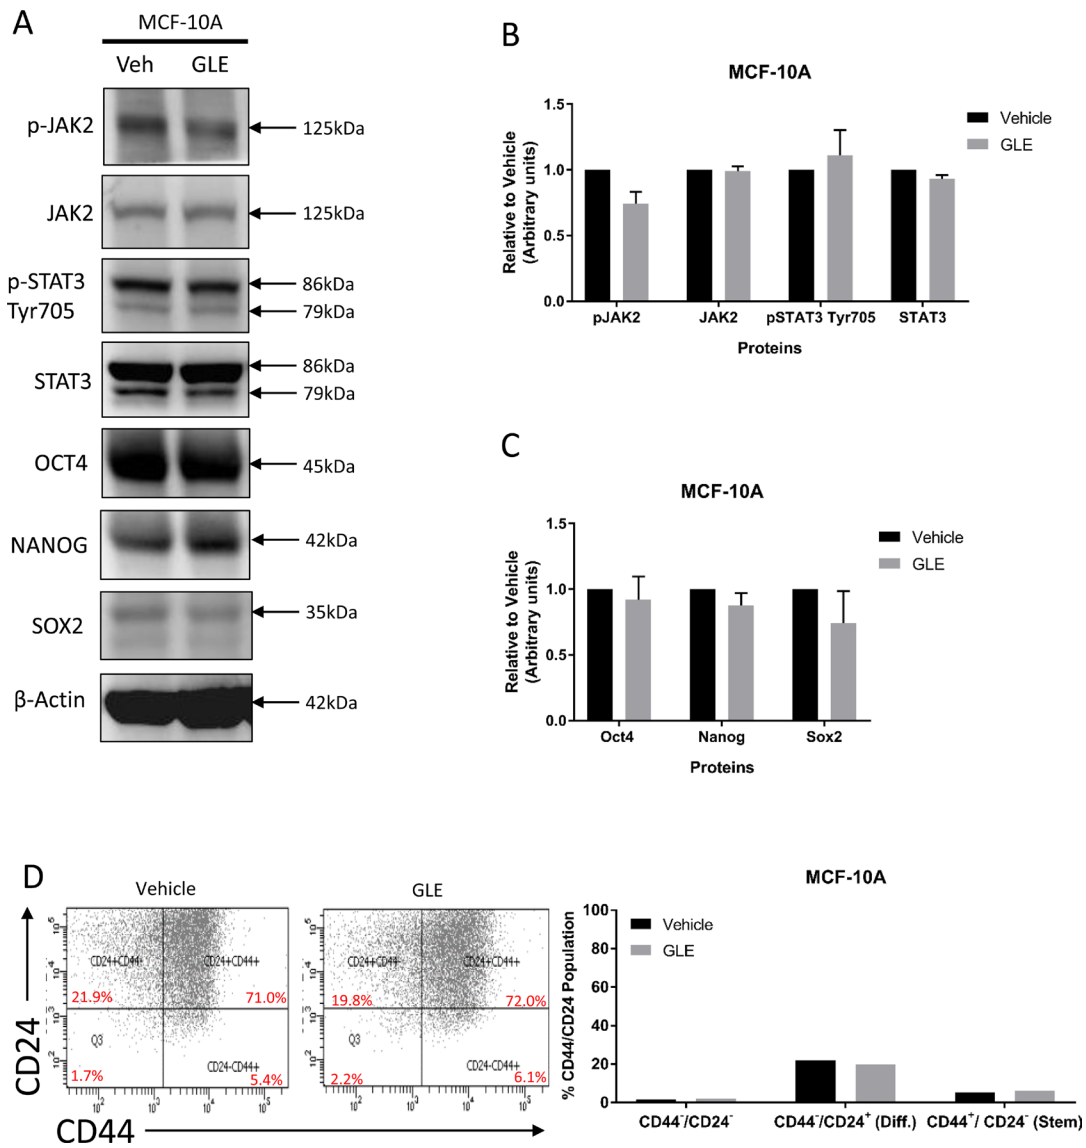

**Supplementary Figure 2: GLE treatment does not decrease protein expression or the CD44<sup>+</sup>/CD24<sup>-</sup> population in MCF-10A cells.** (A–C) Western blot analysis of all selected proteins was performed in MCF-10A cells at 24 h, in which, GLE does not change protein expression of selected proteins, using  $\beta$ -actin as a loading control. (D) Flow cytometry analysis to measure CD44 and CD24 expression in the MCF-10A cell line treated with vehicle and GLE at 24 h, shows that GLE does not affect the CD44<sup>+</sup>/CD24<sup>-</sup> (stem cell) population in non-cancerous mammary epithelial cells. The columns in the western blot analysis represent mean  $\pm$  SEM from 3 independent experiments. The columns in the flow cytometry analysis represent mean  $\pm$  SEM from 1 independent experiment.
